# Supplementary figures and images for: ZAP-70 Regulates Autoimmune Arthritis via Alterations in T Cell Activation and Apoptosis
Source: MDPI journal article supplement (doi:10.3390/cells8050504), 2019-05-24

Figure S3

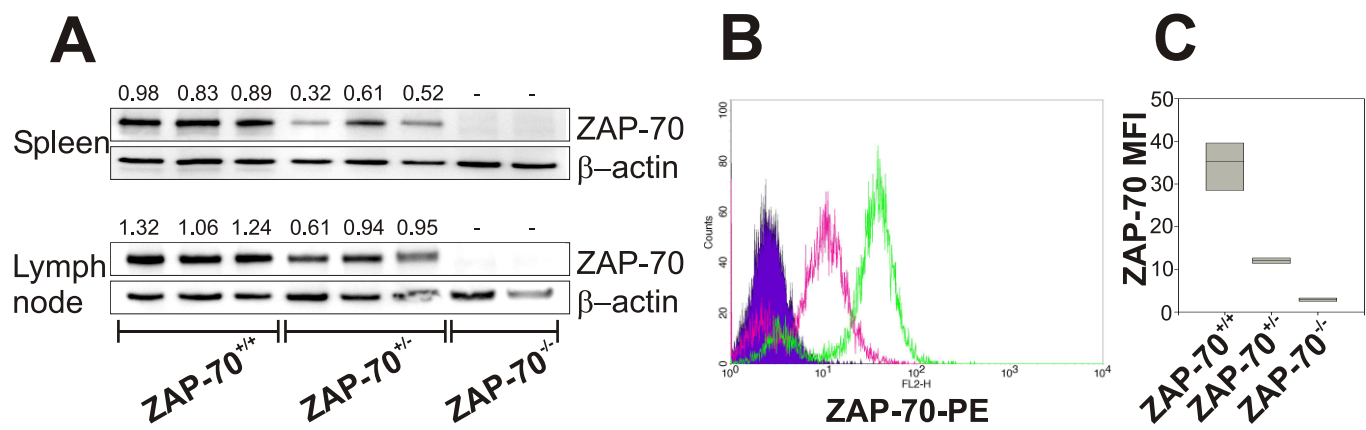

Supplement: s1 [file s1]

**Figure S1**

**A**

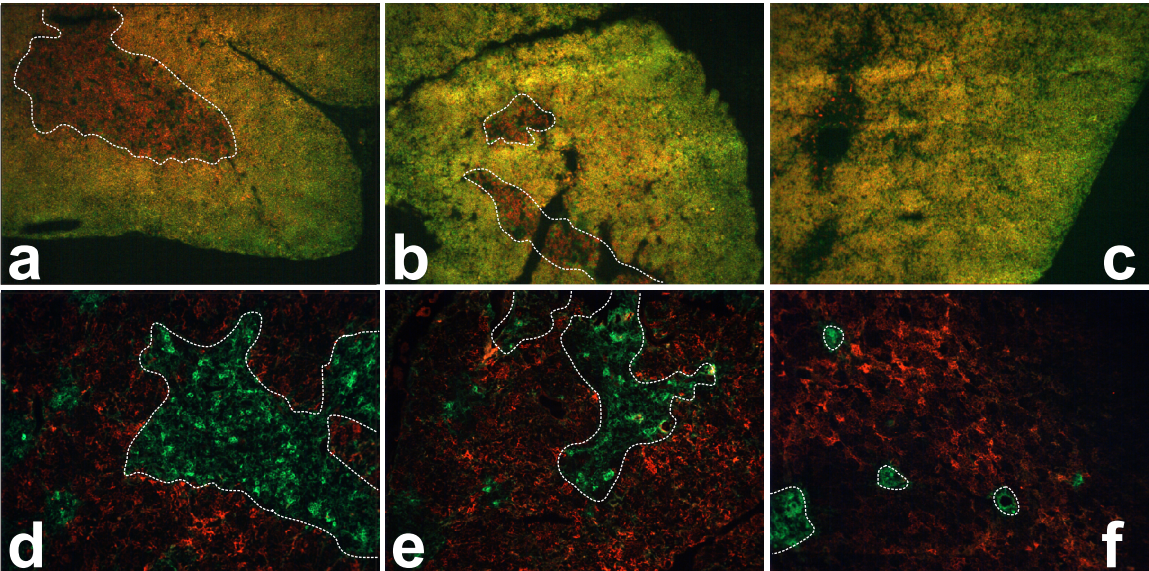

**B**

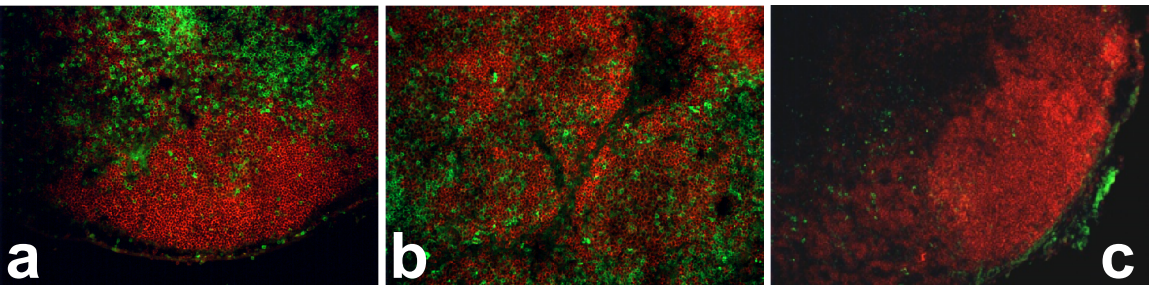

**C**

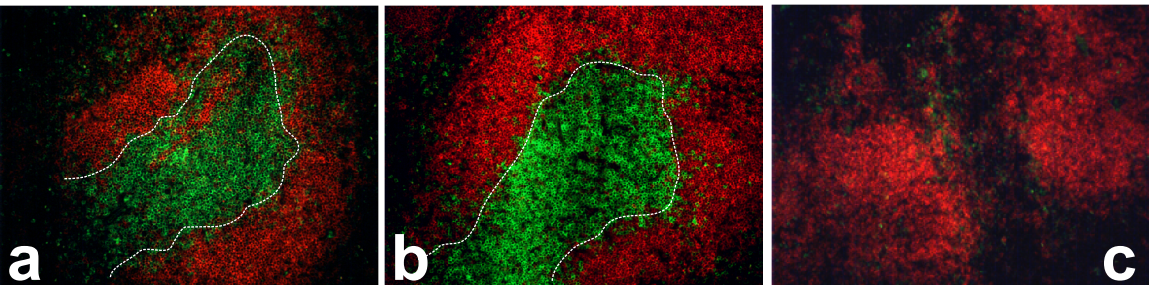

Supplement: s1 [file s1]

# Figure S4

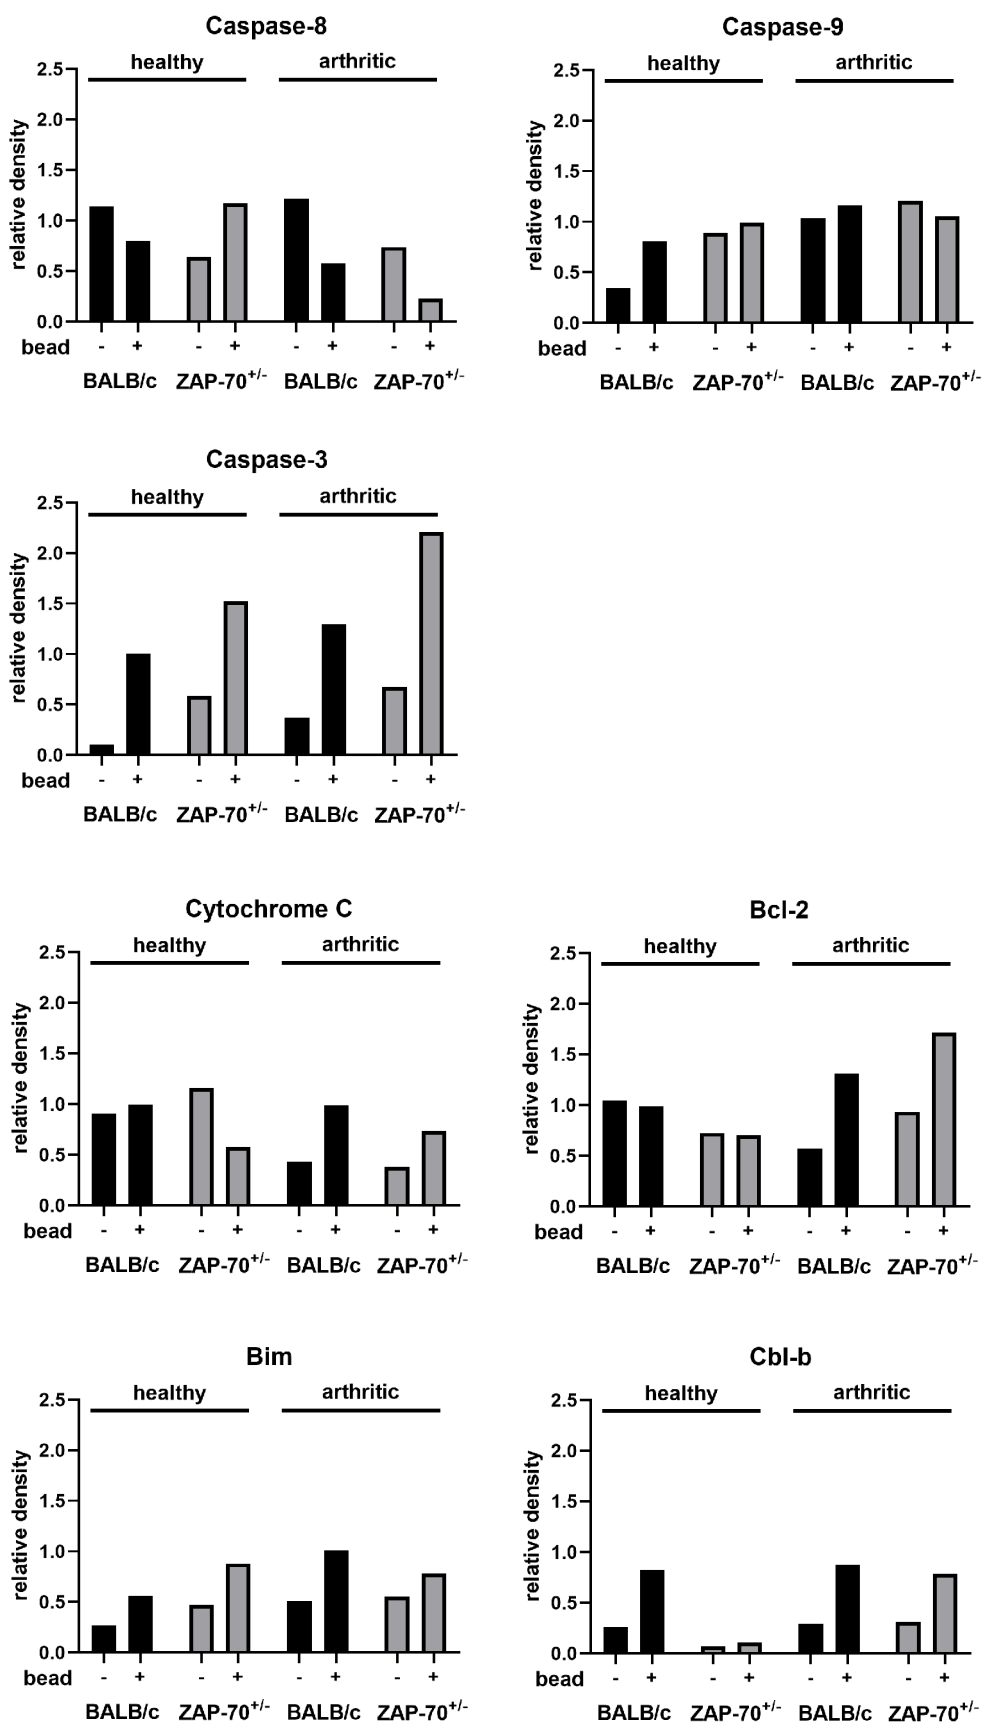

Supplement: s1 [file s1]

# Figure S2

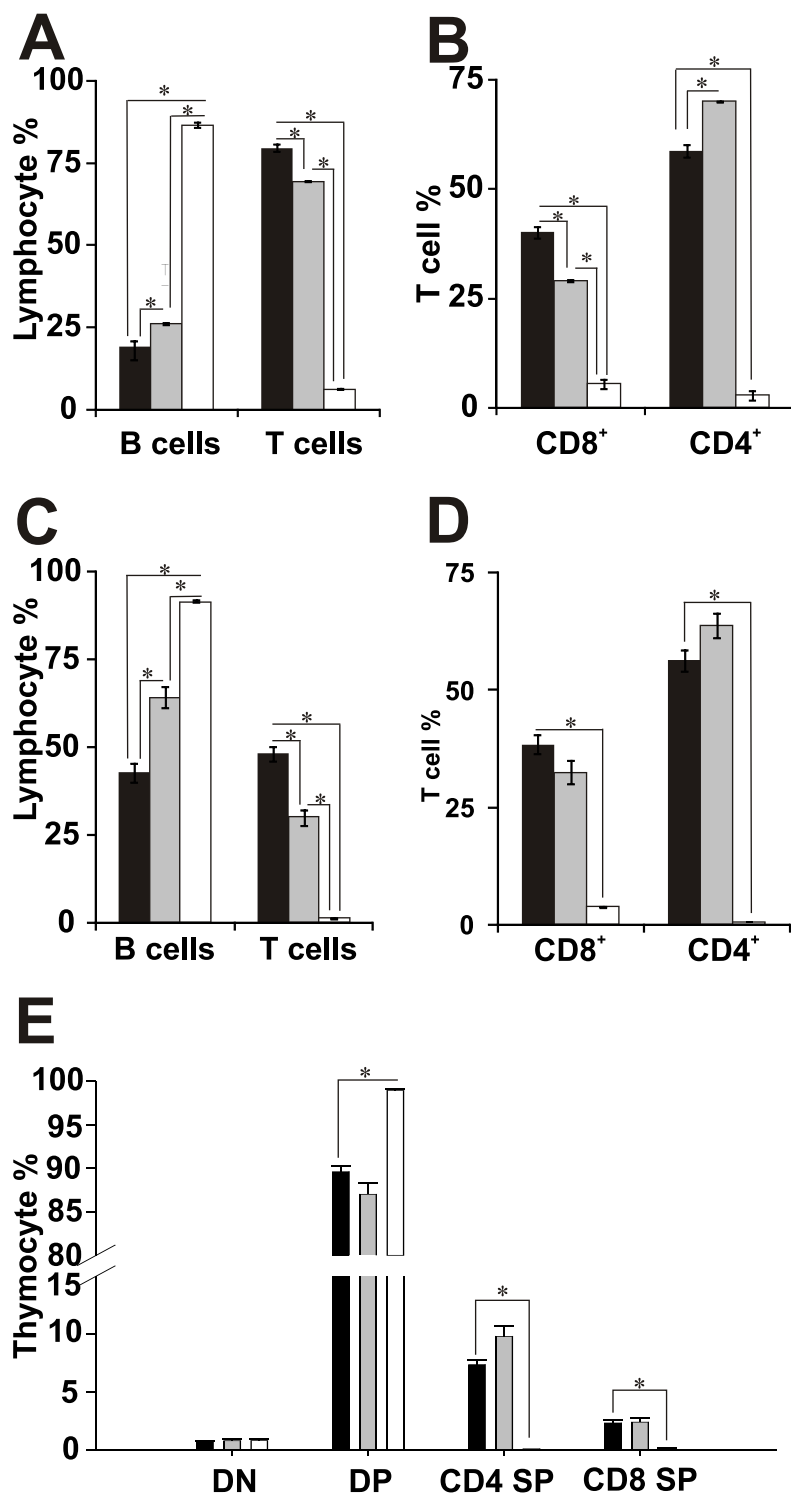

Supplement: s1 [file s1]
